# Supplementary material for: Highly polar 7,7-bis(N,N-dimethylpiperazinium)-8,8-dicyanoquinodimethane in [Ni(dmit)2]− salt: crystal structure and magnetic properties
Source: Royal Society of Chemistry journal article supplement (doi:10.1039/c0ce00322k), 2010-01-01
Supplement: c0ce00322k.pdf [file c0ce00322k.pdf]

## Supporting Information

# Highly Polar 7,7-Bis(*N,N*-dimethylpiperazinium)-8,8-dicyanoquinodimethane in [Ni(dmit)<sub>2</sub>]<sup>-</sup> Salt; Crystal Structure and Magnetic Properties

Subbalakshmi Jayanty, Tomoyuki Akutagawa, Takayoshi Nakamura

Full list of all authors in Ref. 17

Frisch, M. J.; Trucks, G. W.; Schlegel, H. B.; Scuseria, G. E.; Robb, M. A.; Cheeseman, J. R.; Zakrzewski, V. G.; Montgomery, J. A., Jr.; Stratmann, R. E.; Burant, J. C.; Dapprich, S.; Millam, J. M.; Daniels, A. D.; Kudin, K. N.; Strain, M. C.; Farkas, O.; Tomasi, J.; Barone, V.; Cossi, M.; Cammi, R.; Mennucci, B.; Pomelli, C.; Adamo, C.; Clifford, S.; Ochterski, J.; Petersson, G. A.; Ayala, P. Y.; Cui, Q.; Morokuma, K.; Malick, D. K.; Rabuck, A. D.; Raghavachari, K.; Foresman, J. B.; Cioslowski, J.; Ortiz, J. V.; Baboul, A. G.; Stefanov, B. B.; Liu, G.; Liashenko, A.; Piskorz, P.; Komaromi, I.; Gomperts, R.; Martin, R. L.; Fox, D. J.; Keith, T.; Al-Laham, M. A.; Peng, C. Y.; Nanayakkara, A.; Gonzalez, C.; Challacombe, M.; Gill, P. M. W.; Johnson, B.; Chen, W.; Wong, M. W.; Andres, J. L.; Gonzalez, C.; Head-Gordon, M.; Replogle, E. S.; Pople, J. A. *GAUSSIAN 98*; Gaussian, Inc.: Pittsburgh, PA, 1998.

### 1. X-ray Crystal Structural Analysis

The data were collected at a temperature of  $100 \pm 1$  K to a maximum  $2\theta$  value of  $55.0^\circ$ . A total of 76 oscillation images were collected. A sweep of data was done using  $\omega$  scans from  $130.0$  to  $190.0^\circ$  in  $5.0^\circ$  step, at  $\chi=45.0^\circ$  and  $\phi = 0.0^\circ$ . The exposure rate was  $120.0$  [sec./ $^\circ$ ]. A second sweep was performed using  $\omega$  scans from  $0.0$  to  $160.0^\circ$  in  $5.0^\circ$  step, at  $\chi=45.0^\circ$  and  $\phi = 180.0^\circ$ . The exposure rate was  $120.0$  [sec./ $^\circ$ ]. Another sweep was performed using  $\omega$  scans from  $0.0$  to  $160.0^\circ$  in  $5.0^\circ$  step, at  $\chi=0.0^\circ$  and  $\phi = 180.0^\circ$ . The exposure rate was  $120.0$  [sec./ $^\circ$ ]. The crystal-to-detector distance was  $127.40$  mm. Readout was performed in the  $0.100$  mm pixel mode.

Of the 43531 reflections that were collected, 11876 were unique ( $R_{\text{int}} = 0.038$ ); equivalent reflections were merged.

The linear absorption coefficient,  $\mu$ , for Mo-K $\alpha$  radiation is 15.583 cm<sup>-1</sup>. An empirical absorption correction was applied which resulted in transmission factors ranging from 0.579 to 0.792. The data were corrected for Lorentz and polarization effects.

A black block crystal of C<sub>35</sub>H<sub>36</sub>N<sub>6</sub>Ni<sub>2</sub>S<sub>20</sub>O having approximate dimensions of 0.40 x 0.30 x 0.15 mm was mounted on a glass fiber. All measurements were made on a Rigaku RAXIS RAPID imaging plate area detector with graphite monochromated Mo-K $\alpha$  radiation.

The structure was solved by direct methods and expanded using Fourier techniques. The non-hydrogen atoms were refined anisotropically. Hydrogen atoms were refined using the riding model. The final cycle of full-matrix least-squares refinement on F<sup>2</sup> was based on 8142 observed reflections and 619 variable parameters and converged (largest parameter shift was 0.00 times its esd) with unweighted and weighted agreement factors of:

$$R1 = \sum ||F_o| - |F_c|| / \sum |F_o| = 0.0317$$

$$wR2 = [ \sum ( w (F_o^2 - F_c^2)^2 ) / \sum w(F_o^2)^2 ]^{1/2} = 0.0510$$

The standard deviation of an observation of unit weight was 1.07. A Robust-resistant weighting scheme was used<sup>5</sup>. Plots of  $\sum w (|F_o| - |F_c|)^2$  versus  $|F_o|$ , reflection order in data collection,  $\sin \theta/\lambda$  and various classes of indices showed no unusual trends. The maximum and minimum peaks on the final difference Fourier map corresponded to 0.49 and -0.39 e<sup>-</sup>/Å<sup>3</sup>, respectively.

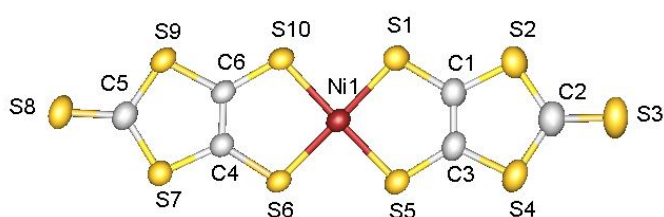

[Ni(dmit)<sub>2</sub>] **A**

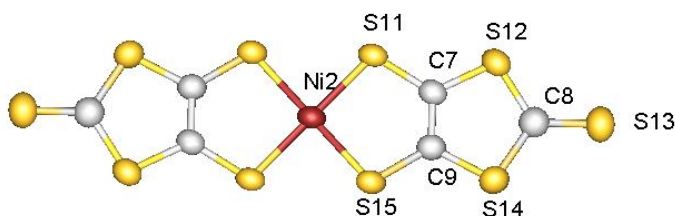

[Ni(dmit)<sub>2</sub>] **B**

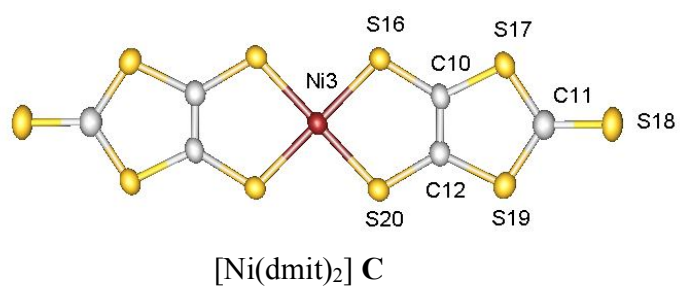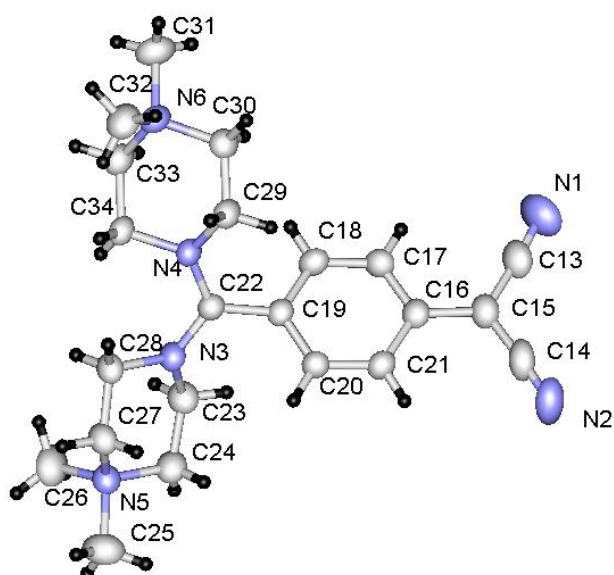

**Figure S1** Atomic numbering scheme of **1** except for hydrogen atoms.

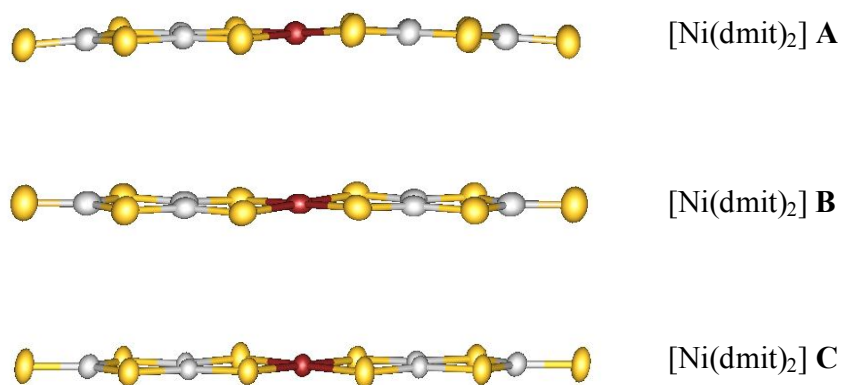

**Figure S2.** [Ni(dmit)<sub>2</sub>] conformation in **1** viewed along the short axis.

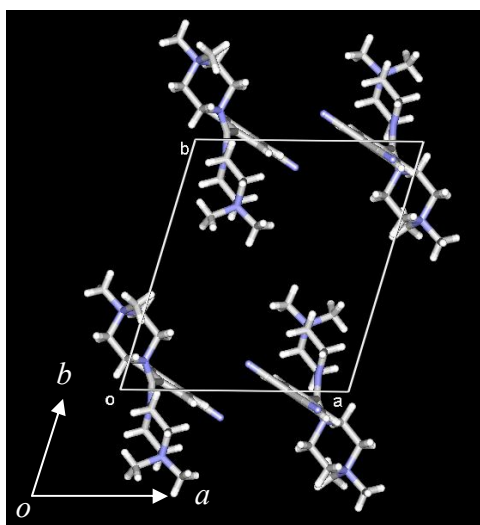

**Figure S3** BDPDQ cation arrangements in the unit cell viewed along the  $c$ -axis.

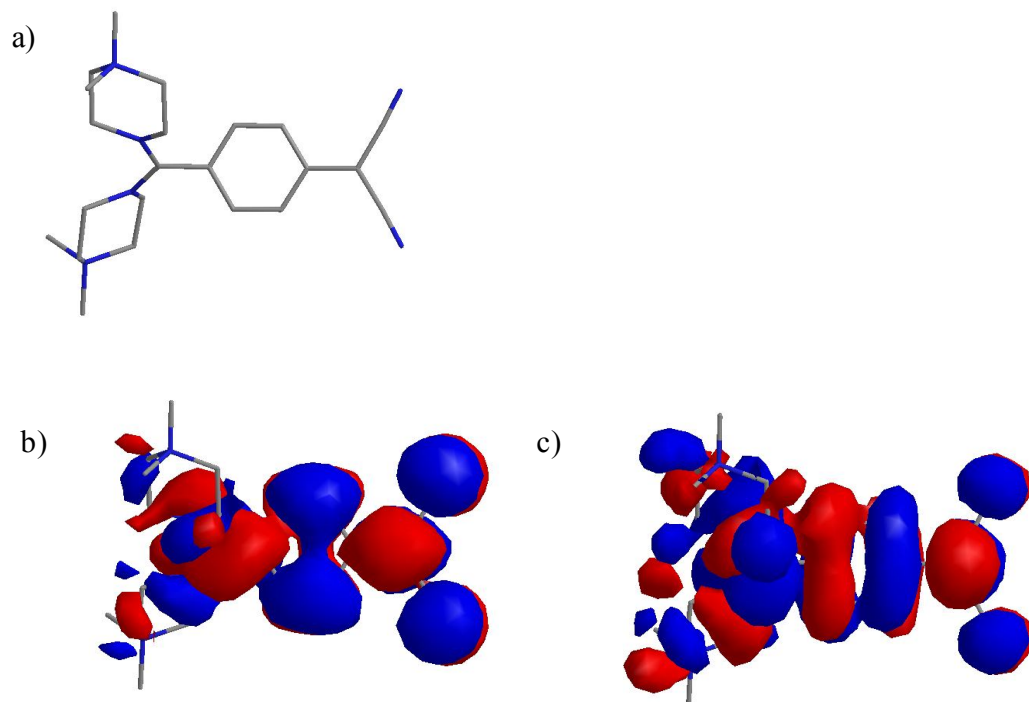

**Figure S4.** DFT calculation of BDPDQ cation. a) Molecular structure of BDPDQ cation. b) HOMO and c) LUMO viewed along the  $\pi$ -plane of BDPDQ.

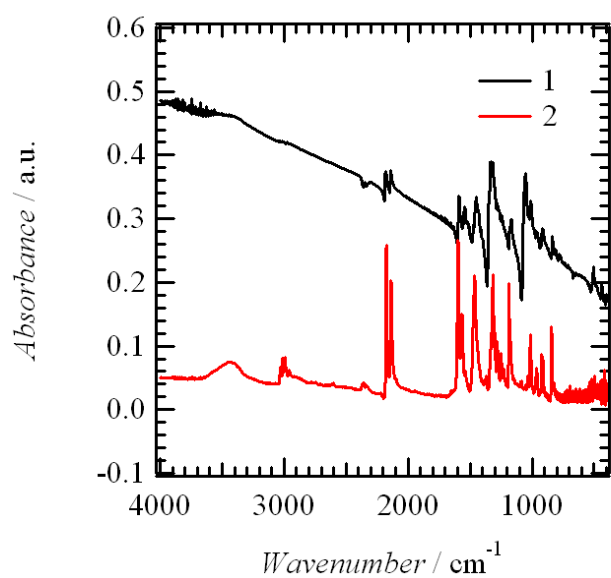

**Figure S5.** Vibrational spectra of crystal **1** and **2** in KBr pellets.

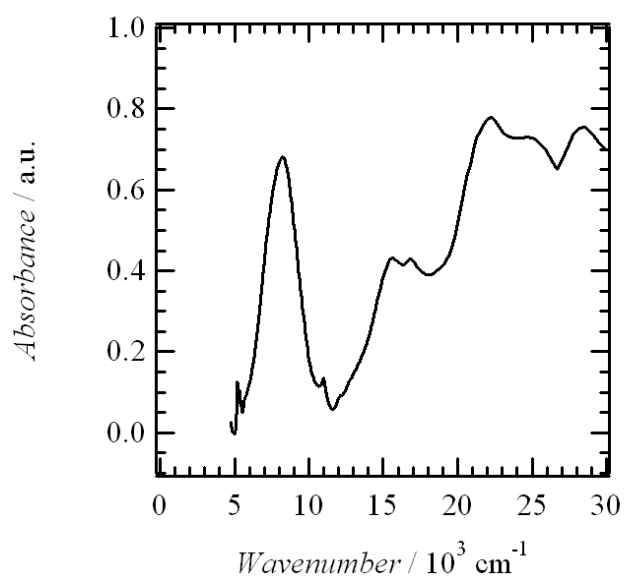

**Figure S6.** Electronic absorption spectrum of monovelant (tetrabutylammonium)[Ni(dmit)<sub>2</sub>]<sup>−</sup> crystal in KBr pellet.

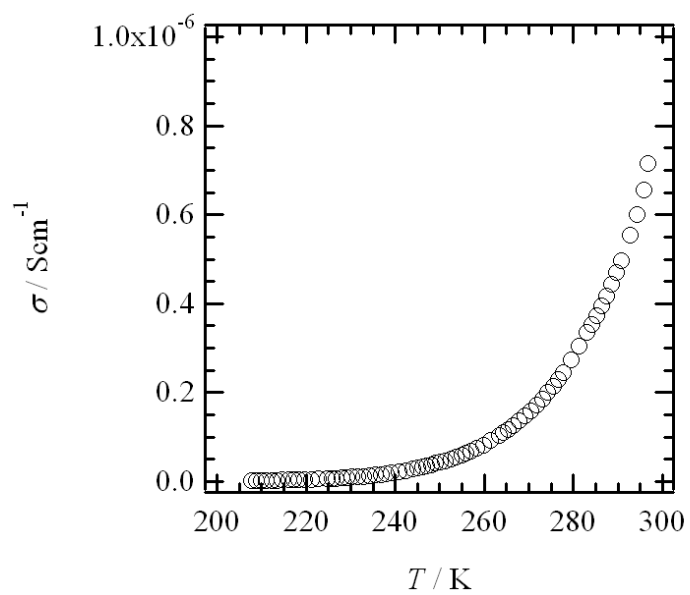

**Figure S7.** Temperature dependent electronic conductivity of single crystal **1**.
